# Supplementary material for: The role of artificial photo backgrounds of shelter dogs on pet profile clicking and the perception of sociability
Source: PLoS One. 2021 Dec 16;16(12):e0255551. doi: 10.1371/journal.pone.0255551 (PMC8675723; doi:10.1371/journal.pone.0255551)
Supplement: S3 File — (R) [file pone.0255551.s004.R]

library(readr)
library(tidyverse)
library(countrycode)
library(ggplot2)
library(car)
library(lme4)
library(emmeans)

library(tibble)
library(tidyr)
library(purr)
library(stringr)
library(forcats)

source("https://gist.githubusercontent.com/benmarwick/2a1bb0133ff568cbe28d/raw/fb53bd97121f7f9ce947837ef1a4c65a73bffb3f/geom_flat_violin.R")

theme_328 <- theme_classic() + 
  theme(
    axis.title = element_text(size = 20), 
    axis.text = element_text(size = 20, colour = "black"), 
    axis.text.x = element_text(margin = margin(t = 14, unit = "pt")), 
    axis.text.y = element_text(margin = margin(r = 14)),
    legend.title = element_text(size = 20), 
    legend.text = element_text(size = 18), 
    strip.text = element_text(size = 18))


###############LOADING DATA##############

background<-read_csv("S3.csv")
View(background)

###############DEMOGRAPHIC##############

###[Table 1]: Demographic factors of participants (n=680)

demographic<-background %>% 
  mutate(continent = countrycode(country, origin = "country.name", destination = "continent")) %>% 
  mutate(age_categories=if_else(age!="18-24" & age!="25-34" & age!="35-44" & age!="45-54" & age!="54-65","65+",age)) %>% 
  mutate(gender_three_categories = if_else(gender != "Male" & gender != "Female", "Other", gender)) 

table(demographic$continent)
(prop.table(table(demographic$continent)))*100
table(demographic$age_categories)
(prop.table(table(demographic$age_categories)))*100
table(demographic$gender_three_categories)
(prop.table(table(demographic$gender_three_categories)))*100
table(demographic$dog_ownership)
(prop.table(table(demographic$dog_ownership)))*100


################TIDYING DATA##############

#1. Pivoting sociability scores only 

dogs_long_pivot <- background %>%
  select(1:29) %>% 
  pivot_longer(starts_with("sociability"), values_to = "sociability_friendliness_score", 
               names_to = c("dog", "background"),
               names_pattern = "sociability_friendliness_score_dog_(.*)_(.*)",
               values_drop_na = TRUE) 
View(dogs_long_pivot)

#2. Pivoting link clicking data only 

# Looking at the link clicking columns
dogs_link_pivot <- background %>% 
  select(1:12,29,30:45) %>% 
  pivot_longer(starts_with("link"), values_to = "link_clicking_behaviour",
               names_to = c("id"),
               names_pattern = "link_clicking_(.*)",
               values_drop_na = TRUE)%>% 
  separate(id, into = c("dog","background"), sep = 1) %>% 
  mutate(background = str_replace_all(background, 
                                      c("K" = "kennel", "O" = "outdoor",
                                        "I" = "indoor", "C" = "colored")))

View(dogs_link_pivot)


#3. Merging link clicking pivoted data and sociability scores pivoted data by demographic data 

data_tidy<-merge(x=dogs_link_pivot,y=dogs_long_pivot,by.x=1:15,by.y=1:15)

View(data_tidy)


################SIMPLIFYING VARIABLES##############


View(data_tidy_2)

data_tidy_2<-data_tidy %>% 
  mutate(continent = countrycode(country, origin = "country.name", destination = "continent")) %>% 
  mutate(age_categories=if_else(age!="18-24" & age!="25-34" & age!="35-44" & age!="45-54" & age!="54-65","65+",age))  

##############TESTING NORMALITY OF DATA - SOCIABILITY SCORES#################


normality_test<-data_tidy_2 %>% 
  group_by(background) 

shapiro.test(normality_test$sociability_friendliness_score)
#data is not normally distributed 

#############CONVERTING VARIABLES INTO FACTORS##############


data_tidy_model_version<-data_tidy_2 %>% 
  select(link_clicking_behaviour,sociability_friendliness_score,background,blinding_score,age_categories,continent,dog_ownership,participant_id,dog) %>% 
  mutate(participant_id= as.factor(participant_id),
         dog=as.factor(dog),
         age_categories=as.factor(age_categories),
         continent=as.factor(continent),
         dog_ownership=as.factor(dog_ownership),
         sociability_friendliness_score=as.factor(sociability_friendliness_score),
         background=as.factor(background),
         blinding_score=as.factor(blinding_score)) %>% 
  mutate(dog = str_replace_all(dog, 
                               c("A" = "Liberty", "B" = "Phatom",
                                 "C" = "Anakin", "D" = "Rogue"))) %>% 
  mutate(dog=as.factor(dog))

glimpse(data_tidy_model_version)
str(data_tidy_model_version)
View(data_tidy_model_version)

##############LINK CLICKING############################### 

###Model 1: Mixed effects logistic regression model (Link clicking vs. background type)


model_1<-glmer(link_clicking_behaviour~sociability_friendliness_score+background+blinding_score+
                        continent+dog_ownership+dog+age_categories+
                        (1|participant_id),data=data_tidy_model_version, family = "binomial")


summary(model_1)

drop1(model_1,test= "Chisq")
Anova(model_1)

###Post-Hoc pairwise comparisons for dog type 

emmeans<-pairs(emmeans(model_1,~dog))
emmeans

model_dog<-glmer(link_clicking_behaviour~dog_ownership+(1|participant_id), data=data_tidy_model_version, family = "binomial")

Anova(model_dog)


###[Table 3]: Summary of participant link clicking between background types 

link_vs_background<-data_tidy_model_version %>% 
  select(link_clicking_behaviour,background) %>% 
  mutate(link_clicking_behaviour=as.factor(link_clicking_behaviour))

link_graph<-link_vs_background %>% 
  rename("Clicked link"="link_clicking_behaviour") %>% 
  group_by(background,`Clicked link`) %>% 
  summarise(count=n()) %>% 
  rename("Number of participants"="count") %>% 
  mutate(background = str_replace_all(background, 
                                      c("indoor" = "Indoor","kennel"="Kennel","outdoor"="Outdoor", "colored"="Coloured"))) %>% 
  mutate(`Clicked link` = str_replace_all(`Clicked link`, 
                                          c("0" = "Did not click", 
                                            "1" = "Clicked"))) 


View(link_graph)

#a) Percentage by background type 

View(link_graph)

percentage_background<-link_graph %>% 
  mutate(`Number of participants` = as.numeric(`Number of participants`)) %>% 
  mutate(total = sum(`Number of participants`)) %>% 
  mutate(percentage = (((`Number of participants`)/total)*100))


View(percentage_background)


#b) All 


sum(percentage_background$`Number of participants`) #2720

#b.1) Did not click 
no_all<-percentage_background %>% 
  filter(`Clicked link` =="Did not click")

View(no_all)
sum(no_all$`Number of participants`) #2591 

(2591/2720)*100

#b.2) Clicked 

yes_all<-percentage_background %>% 
  filter(`Clicked link` =="Clicked")
sum(yes_all$`Number of participants`) #129 

(129/2720)*100


###Figure 3: Link Clicking by dog type 

link_dog<-data_tidy_2%>% 
  select(link_clicking_behaviour,dog) %>% 
  mutate(link_clicking_behaviour=as.factor(link_clicking_behaviour)) %>% 
  mutate(dog=as.factor(dog))

dog_link<-data_tidy_2 %>% 
  select(dog, link_clicking_behaviour) %>% 
  group_by(dog) %>% 
  count(link_clicking_behaviour) %>% 
  mutate(link_clicking_behaviour=as.factor(link_clicking_behaviour)) %>% 
  mutate(dog=as.factor(dog)) %>% 
  mutate(link_clicking_behaviour = str_replace_all(link_clicking_behaviour, 
                                                   c("0" = "did_not_click", "1" = "clicked"))) %>% 
  pivot_wider(1:3,values_from=("n"),
              names_from=("link_clicking_behaviour")) %>% 
  mutate(total=clicked+did_not_click) %>% 
  mutate(proportion_clicked=clicked/total) %>% 
  mutate(percentage=proportion_clicked*100) %>% 
  mutate(dog = str_replace_all(dog, 
                               c("A" = "Liberty", "B" = "Phantom",
                                 "C" = "Anakin", "D" = "Rogue"))) 


View(dog_link)

pairs(emmeans(model_1,~dog))


figure_3<-ggplot(dog_link, aes(y=`proportion_clicked`, x=dog)) + 
  geom_bar(stat="identity") + 
  ylab("percent") +
  theme_328+
  labs(x="Dog ID",y="Clicked link (%)")+
  scale_y_continuous(labels = scales::percent_format())+
  #Anakin
  geom_text(aes(1.0, 0.04), label= 'a', size = 6) +
  #Liberty
  geom_text(aes(2.0, 0.074), label= 'b', size=6) +
  #Phantom
  geom_text(aes(3.0, 0.053), label= 'abc', size=6)+ 
  #Rogue
  geom_text(aes(4.0, 0.041), label= 'ac', size=6)


figure_3

#How to export in a tif format 
tiff("figure_3.tiff", units="in", width=9, height=9, res=300)
figure_3
dev.off()


###Table 4: The number (n) and percentage (%) of participants clicking on pet profiles by photo manipulation awareness scores (1-5). 

link_mixed<-data_tidy_2 %>% 
  select(dog,sociability_friendliness_score,link_clicking_behaviour,background, blinding_score,dog_ownership,participant_id,age_categories)


dog_blind_link<-link_mixed %>% 
  select(blinding_score, link_clicking_behaviour) %>% 
  group_by(blinding_score) %>% 
  count(link_clicking_behaviour) %>% 
  mutate(link_clicking_behaviour=as.factor(link_clicking_behaviour)) %>% 
  mutate(blinding_score=as.factor(blinding_score)) %>% 
  mutate(link_clicking_behaviour = str_replace_all(link_clicking_behaviour, 
                                                   c("0" = "did_not_click", "1" = "clicked"))) %>% 
  pivot_wider(1:3,values_from=("n"),
              names_from=("link_clicking_behaviour")) %>% 
  mutate(total=clicked+did_not_click) %>% 
  mutate(proportion_clicked=clicked/total) %>% 
  mutate(percentage=proportion_clicked*100) 


View(dog_blind_link)


###########################Sociability Scores#####################

###Model 2: Mixed effects Poison model (background type vs. sociability scores)

sociability<-data_tidy_2 %>% 
  select(participant_id,sociability_friendliness_score,dog_ownership,dog, blinding_score, background, continent, age_categories) %>% 
  mutate(dog = str_replace_all(dog, 
                               c("A" = "Liberty", "B" = "Phantom",
                                 "C" = "Anakin", "D" = "Rogue")))


model_2<-glmer(sociability_friendliness_score~background+dog_ownership+dog+blinding_score+continent+dog+ age_categories+
                      (1|participant_id),data=sociability, family = "poisson")

Anova(model_2)
emmeans(model_2,~dog)
emmeans(model_2,~continent)
dog_eemeans<-pairs(emmeans(model_2,~dog))
dog_eemeans
continent_eemeans<-pairs(emmeans(model_2,~continent))
continent_eemeans


summary(model_2)


###Table 5: Sociability scores between continents 

table_5<-data_tidy_2 %>% 
  group_by(continent) %>% 
  summarize(mean=mean(sociability_friendliness_score), sd=sd(sociability_friendliness_score), median=median(sociability_friendliness_score), IQR = IQR(sociability_friendliness_score))

View(table_5)

table(data_tidy_2$continent)


###Figure 4: Sociability scores by background type rain plot 


data_tidy_new<-data_tidy_2 %>% 
  mutate(background = str_replace_all(background, 
                                      c("indoor" = "Indoor","kennel"="Kennel","outdoor"="Outdoor", "colored"="Coloured")))


lb<-mean(data_tidy_new$sociability_friendliness_score)-sd(data_tidy_new$sociability_friendliness_score)
ub<-mean(data_tidy_new$sociability_friendliness_score)+sd(data_tidy_new$sociability_friendliness_score)


glimpse(data_tidy_2)

rain <- data_tidy_new %>% 
  select(sociability_friendliness_score, background) %>% 
  group_by(background)%>% 
  mutate("lb" = mean(data_tidy_new$sociability_friendliness_score)-sd(data_tidy_new$sociability_friendliness_score)) %>% 
  mutate("ub" = mean(data_tidy_new$sociability_friendliness_score)+sd(data_tidy_new$sociability_friendliness_score))


raincloud_theme <- theme(
  text = element_text(size = 10),
  axis.title.x = element_text(size = 16),
  axis.title.y = element_text(size = 16),
  axis.text = element_text(size = 14),
  legend.title = element_text(size = 16),
  legend.text = element_text(size = 16),
  legend.position = "right",
  plot.title = element_text(lineheight = .8, face = "bold", size = 16),
  panel.border = element_blank(),
  panel.grid.minor = element_blank(),
  panel.grid.major = element_blank(),
  axis.line.x = element_line(colour = "black", size = 0.5, linetype = "solid"),
  axis.line.y = element_line(colour = "black", size = 0.5, linetype = "solid"))


figure_4 <- 
  ggplot(data = rain, 
         aes(x = background, y = sociability_friendliness_score, fill = background)) +
  geom_flat_violin(position = position_nudge(x = .2, y = 0), alpha = .8) +
  geom_point(aes(y = sociability_friendliness_score, color = background), 
             position = position_jitter(width = .15), size = .5, alpha = 0.8) +
  geom_boxplot(width = .1, outlier.shape = NA, alpha = 0.5) +
  expand_limits(x = 5.25) +
  guides(fill = FALSE) +
  guides(color = FALSE) +
  scale_color_brewer(palette = "BrBG") +
  scale_fill_brewer(palette = "BrBG") +
  coord_flip() + # flip or not
  theme_328+
  labs(x="Background type", y="Sociability scores (0-10)")+
  scale_y_discrete(limit=c(0,1,2,3,4,5,6,7,8,9,10)) 


figure_4


tiff("figure_4.tiff", units="in", width=9, height=9, res=300)
figure_4
dev.off()

###S1: Supplementary material 1 - sociability scores between dog ID and background type 

Anakin<-data_tidy_2 %>% 
  select(sociability_friendliness_score, dog, background) %>% 
  mutate(dog=as.factor(dog)) %>% 
  mutate(dog = str_replace_all(dog, 
                               c("A" = "Liberty", "B" = "Phantom",
                                 "C" = "Anakin", "D" = "Rogue"))) %>% 
  group_by(background,dog) %>% 
  filter(dog == "Anakin") %>% 
  summarize(mean_score = mean(sociability_friendliness_score), sd_score = sd(sociability_friendliness_score), median = median(sociability_friendliness_score), IQR = IQR(sociability_friendliness_score))

  

View(Anakin)


Phantom<-data_tidy_2 %>% 
  select(sociability_friendliness_score, dog, background) %>% 
  mutate(dog=as.factor(dog)) %>% 
  mutate(dog = str_replace_all(dog, 
                               c("A" = "Liberty", "B" = "Phantom",
                                 "C" = "Anakin", "D" = "Rogue"))) %>% 
  group_by(background,dog) %>% 
  filter(dog == "Phantom") %>% 
  summarize(mean_score = mean(sociability_friendliness_score), sd_score = sd(sociability_friendliness_score), median = median(sociability_friendliness_score), IQR = IQR(sociability_friendliness_score))


View(Phantom)


Liberty<-data_tidy_2 %>% 
  select(sociability_friendliness_score, dog, background) %>% 
  mutate(dog=as.factor(dog)) %>% 
  mutate(dog = str_replace_all(dog, 
                               c("A" = "Liberty", "B" = "Phantom",
                                 "C" = "Anakin", "D" = "Rogue"))) %>% 
  group_by(background,dog) %>% 
  filter(dog == "Liberty") %>% 
  summarize(mean_score = mean(sociability_friendliness_score), sd_score = sd(sociability_friendliness_score), median = median(sociability_friendliness_score), IQR = IQR(sociability_friendliness_score))


View(Liberty)


Rogue<-data_tidy_2 %>% 
  select(sociability_friendliness_score, dog, background, participant_id) %>% 
  mutate(dog=as.factor(dog)) %>% 
  mutate(dog = str_replace_all(dog, 
                               c("A" = "Liberty", "B" = "Phantom",
                                 "C" = "Anakin", "D" = "Rogue"))) %>% 
  group_by(background,dog) %>% 
  filter(dog == "Rogue") %>% 
  summarize(mean_score = mean(sociability_friendliness_score), sd_score = sd(sociability_friendliness_score), median = median(sociability_friendliness_score), IQR = IQR(sociability_friendliness_score))


View(Rogue)

s1<-group_by(data_tidy_2,dog)
summarise(s1, group_mean=mean(sociability_friendliness_score))

summarise(s1,group_median=median(sociability_friendliness_score))
summarise(s1,group_sd=sd(sociability_friendliness_score))
summarise(s1,group_IQR=IQR(sociability_friendliness_score))


dog_A<-filter(data_tidy_2, dog=="A")
dog_B<-filter(data_tidy_2, dog=="B")
dog_C<-filter(data_tidy_2, dog=="C")
dog_D<-filter(data_tidy_2, dog=="D")


table(dog_A$background)
table(dog_B$background)
table(dog_C$background)
table(dog_D$background)
